# Supplementary material for: One-dimensional hierarchical Bi2WO6 hollow tubes with porous walls: synthesis and photocatalytic property
Source: Royal Society of Chemistry journal article supplement (doi:10.1039/c3ce40237a), 2013-01-01
Supplement: c3ce40237a.pdf [file c3ce40237a.pdf]

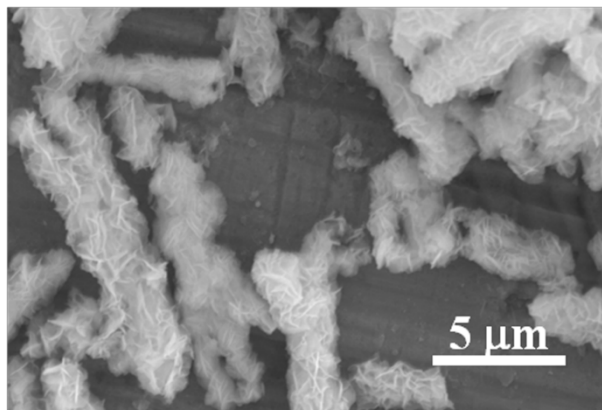

**Fig. S1** FESEM image of as-prepared samples treated ultrasonically for a long period.

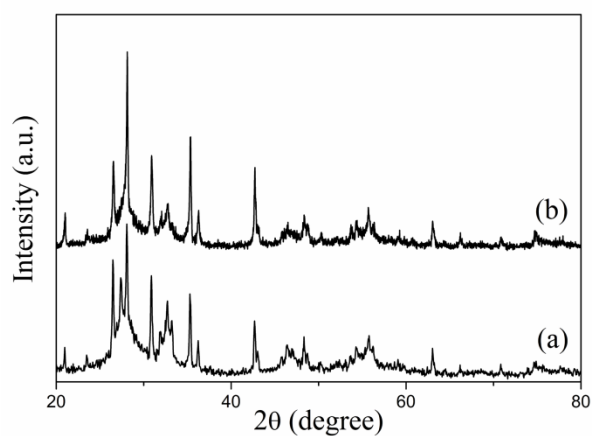

**Fig.S2** XRD patterns of products synthesized under different reactant adding sequences: (a) Sequence (i); (b) Sequence (ii).

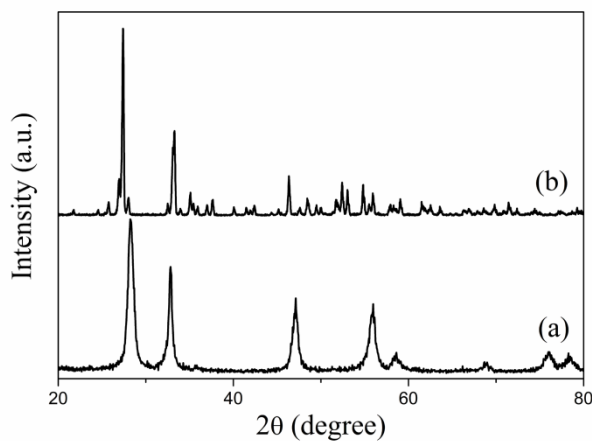

**Fig.S3** XRD patterns of products synthesized at different pH values: (a) 5.5; (b) 7.5.

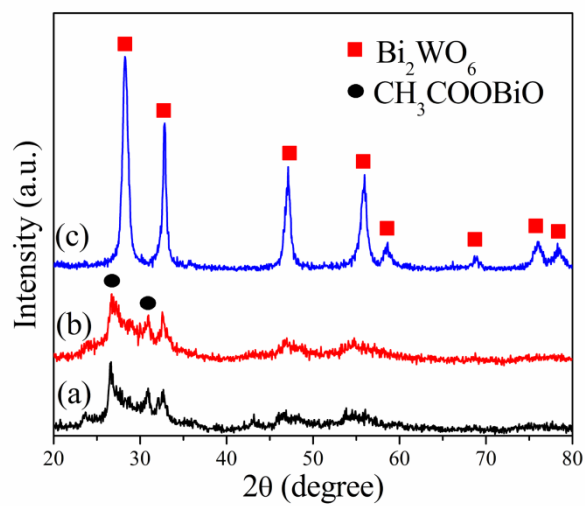

**Fig. S4** XRD patterns for products (a) room temperature reaction for 15min, (b) room temperature reaction for 6h; (c) room temperature reaction for 15min, then solvothermal treatment for 6h.

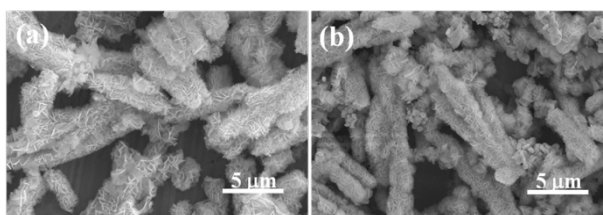

**Fig.S5** FESEM images of different samples: (a)  $\text{Bi}_2\text{MoO}_6$ ; (b)  $\text{BiVO}_4$ .
